# Supplementary material for: 1D Cu(i)-based chiral organic–inorganic hybrid material with second harmonic generation and circular polarized luminescence
Source: Royal Society of Chemistry journal article supplement (doi:10.1039/d4dt00735b), 2024-01-01
Supplement: d4dt00735b1.pdf [file d4dt00735b1.pdf]

*Supplementary Information*

**1D Cu(I)-based chiral organic-inorganic hybrid material with  
second harmonic generation and circular polarized  
luminescence**

Zhi-Yuan Wu,<sup>a,c</sup> Mu-Xin Yu,<sup>b</sup> Zi-Qing Zhang,<sup>a</sup> Jia-Xin Jiang,<sup>a</sup> Ting Liu,<sup>a</sup> Fei-Long Jiang,<sup>a</sup> Lian Chen,<sup>\*a</sup> and Mao-Chun Hong<sup>a</sup>

a. State Key Laboratory of Structural Chemistry, Fujian Institute of Research on the Structure of Matter, Chinese Academy of Sciences (CAS), Fuzhou, Fujian 350002, China.

b. Organic Optoelectronics Engineering Research Center of Fujian's Universities, College of Electronics and Information Science, Fujian Jiangxia University, Fuzhou, Fujian, 350108, China

c. Fuzhou University, Fuzhou, Fujian, 350002, China.

Corresponding Authors:

\* E-mail address: cl@fjirsm.ac.cn.

Supporting Figures:

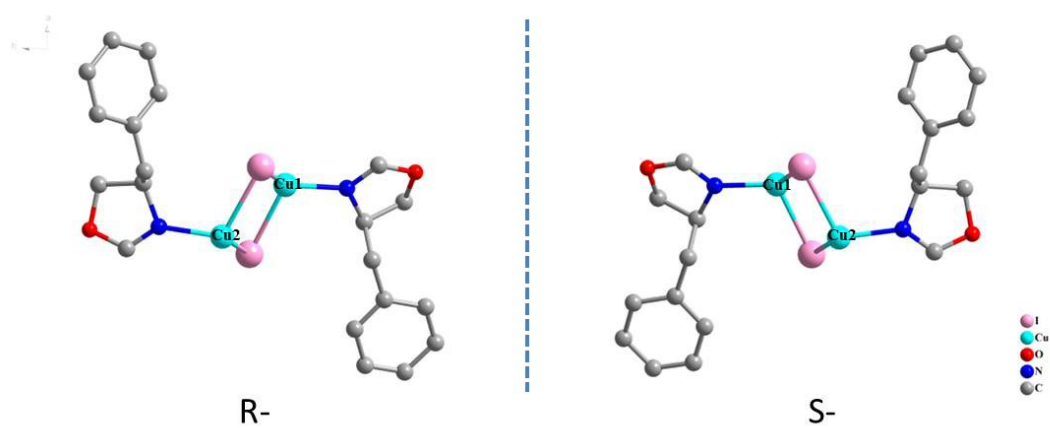

Fig. S1. The asymmetric units of the *R/S*- $\text{Cu}_2\text{I}_2$ .

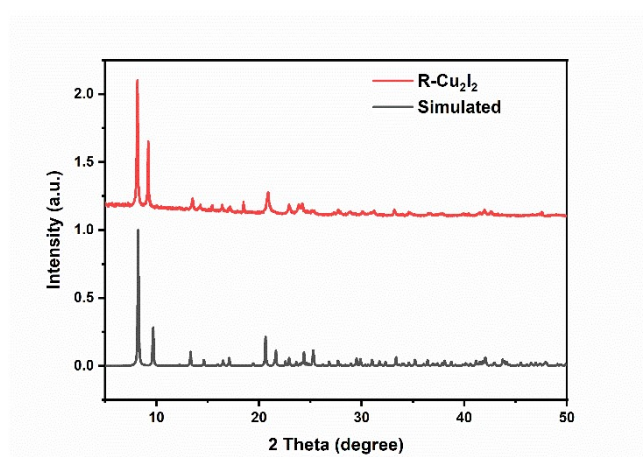

(a)

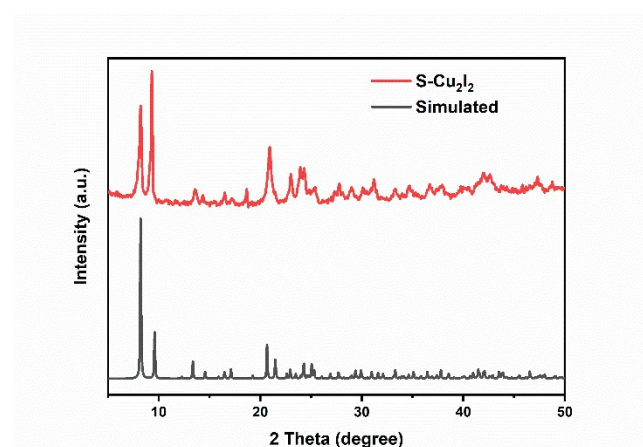

(b)

Fig. S2. Simulated and experimental power XRD patterns of *R*- $\text{Cu}_2\text{I}_2$  (a) and *S*- $\text{Cu}_2\text{I}_2$  (b).

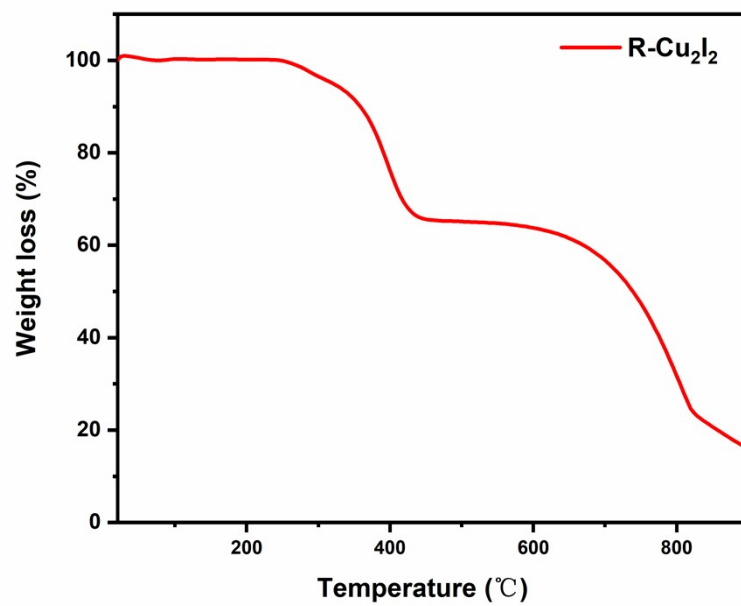

(a)

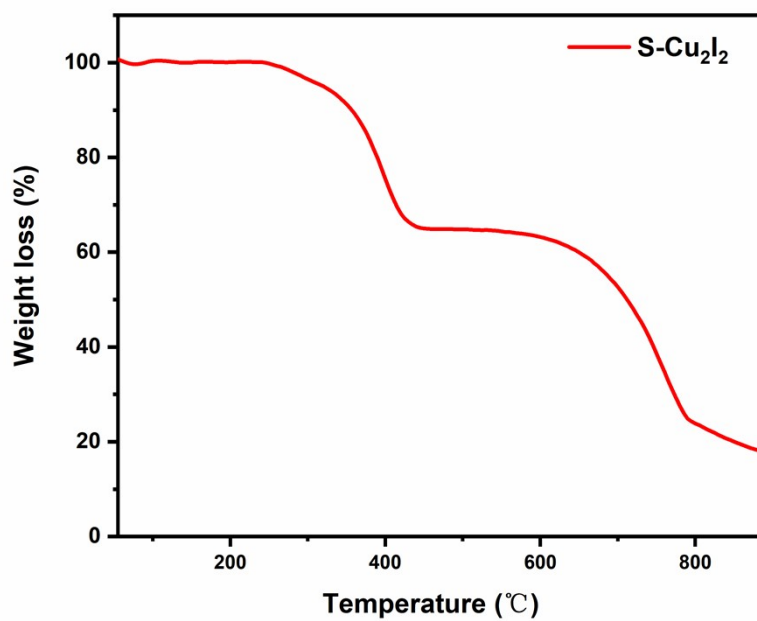

(b)

Fig. S3. The TGA curves of R-Cu<sub>2</sub>I<sub>2</sub> (a) and S-Cu<sub>2</sub>I<sub>2</sub> (b).

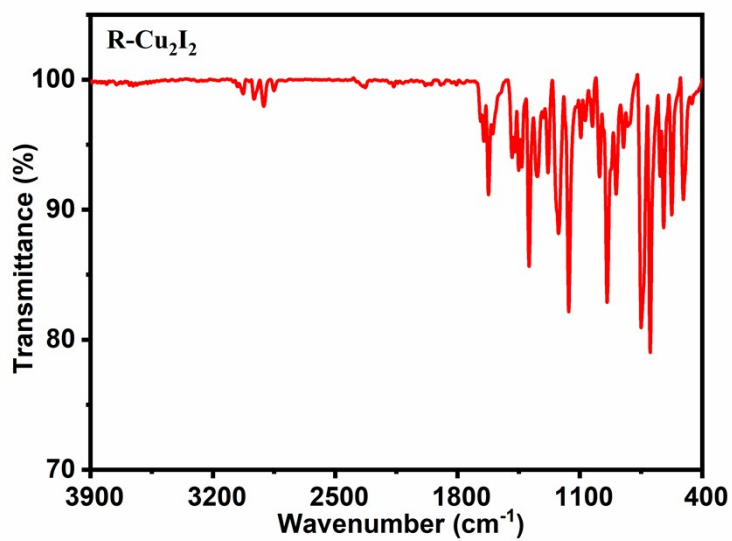

(a)

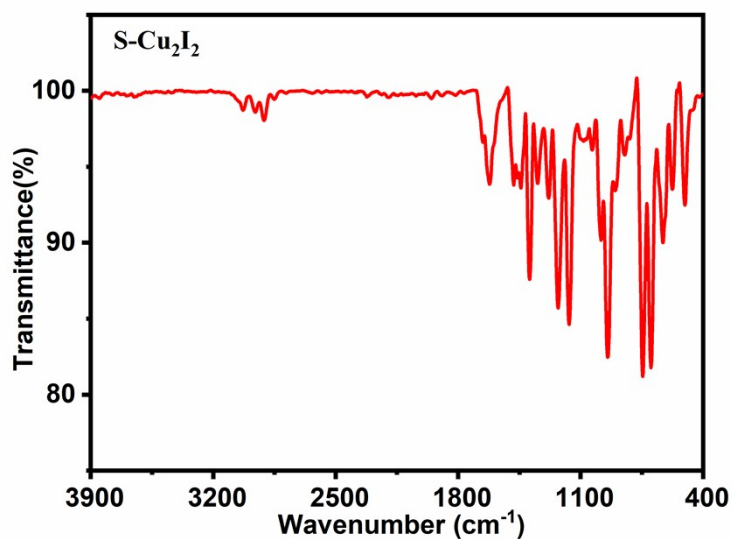

(b)

Fig. S4. Infrared spectra of R-Cu<sub>2</sub>I<sub>2</sub> (a) and S-Cu<sub>2</sub>I<sub>2</sub> (b).

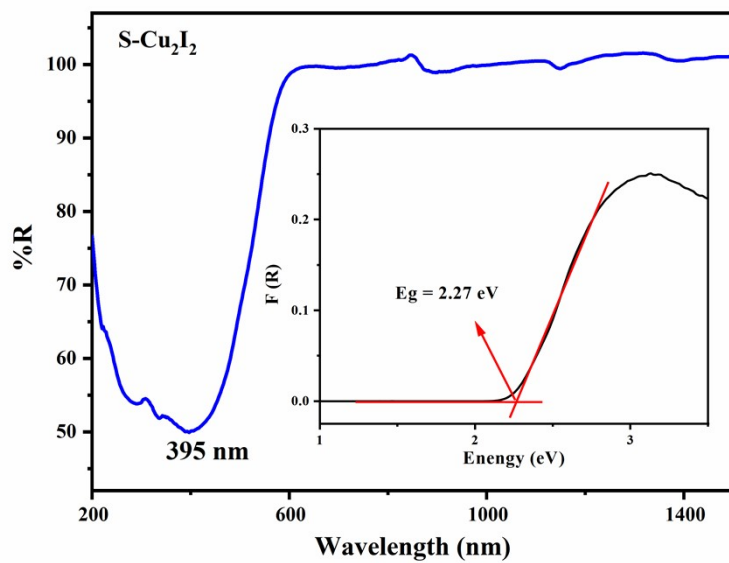

Fig. S5. UV-vis diffuse reflectance spectrum and experimental bandgap for  $S-Cu_2I_2$ .

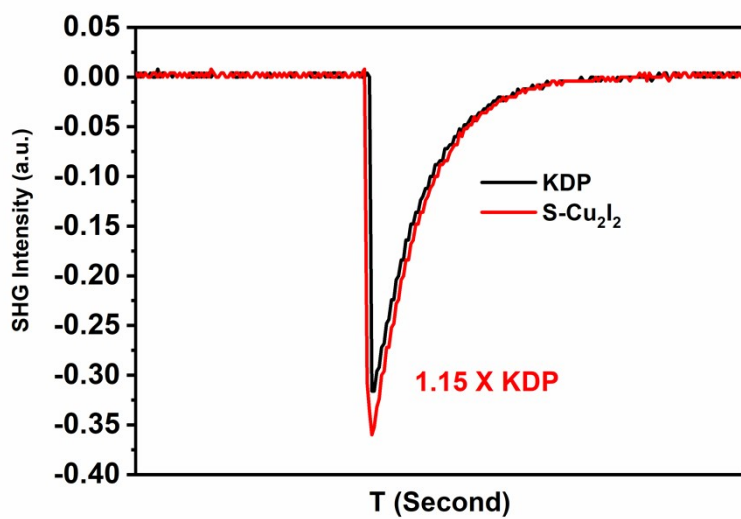

Fig. S6. Comparison of SHG intensities between  $S-Cu_2I_2$  and KDP.

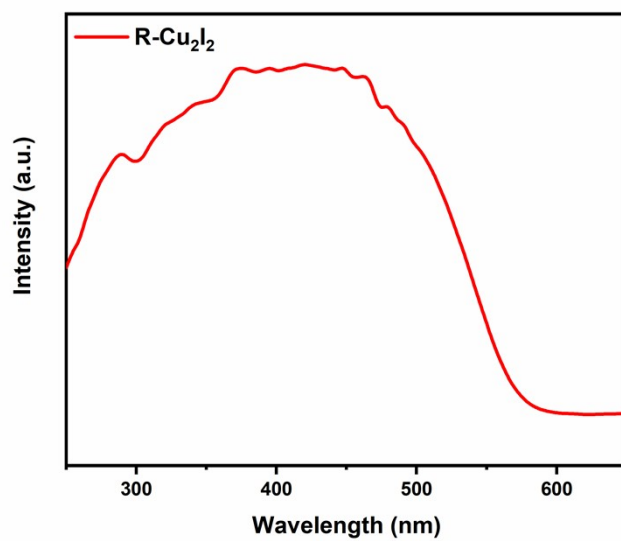

(a)

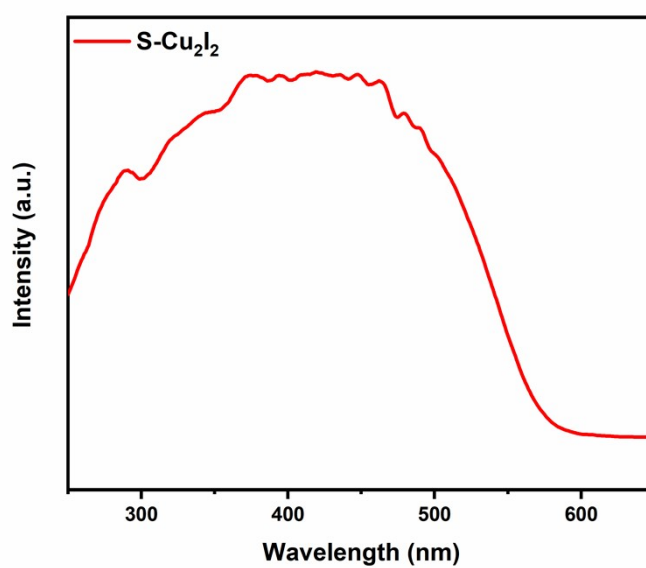

(b)

Fig. S7. Excitation spectra of  $R\text{-Cu}_2\text{I}_2$  (a) and  $S\text{-Cu}_2\text{I}_2$  (b).

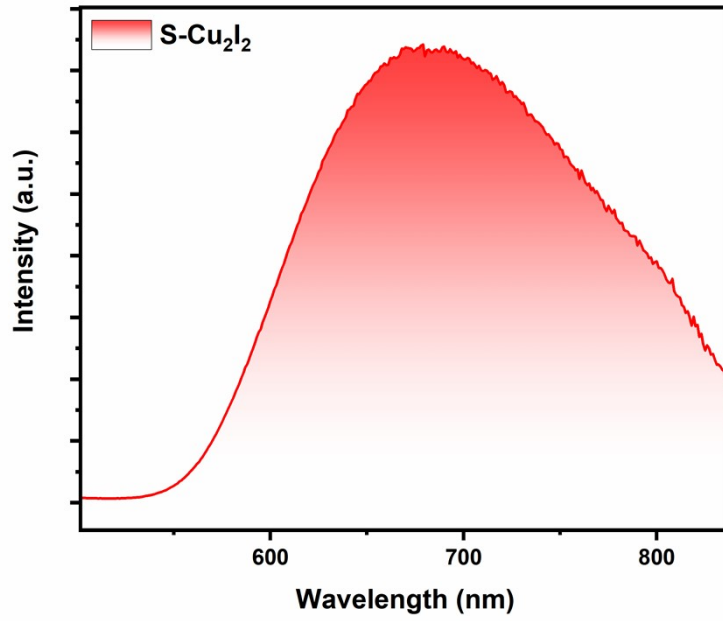

Fig. S8. Emission spectrum of S-Cu<sub>2</sub>I<sub>2</sub>.

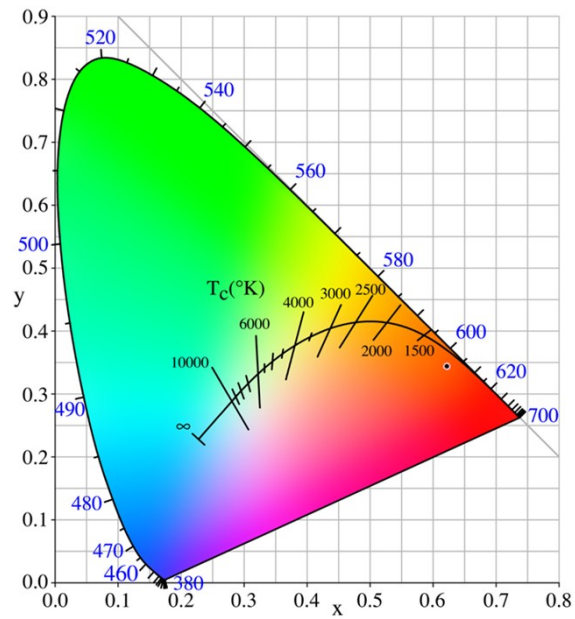

Fig. S9. The chromaticity coordinate diagram of S-Cu<sub>2</sub>I<sub>2</sub>.

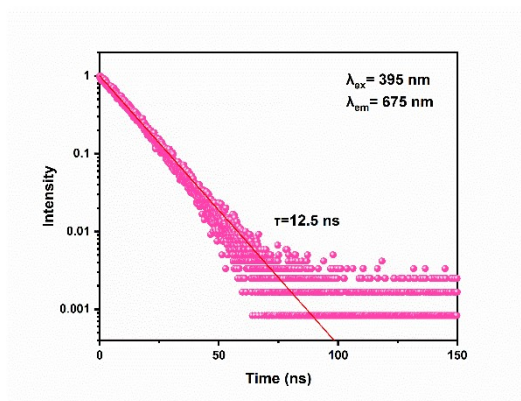

(a)

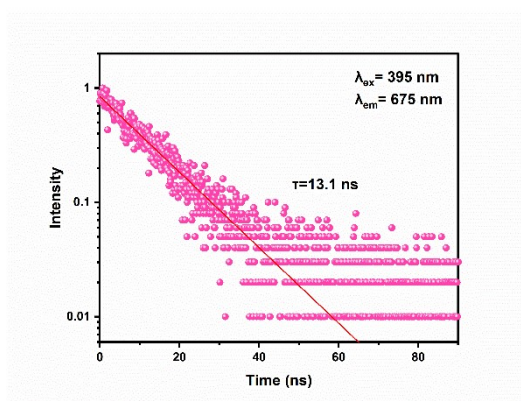

(b)

Fig. S10. Time-resolved PL decay curves of  $R\text{-Cu}_2\text{I}_2$  (a) and  $S\text{-Cu}_2\text{I}_2$  (b).

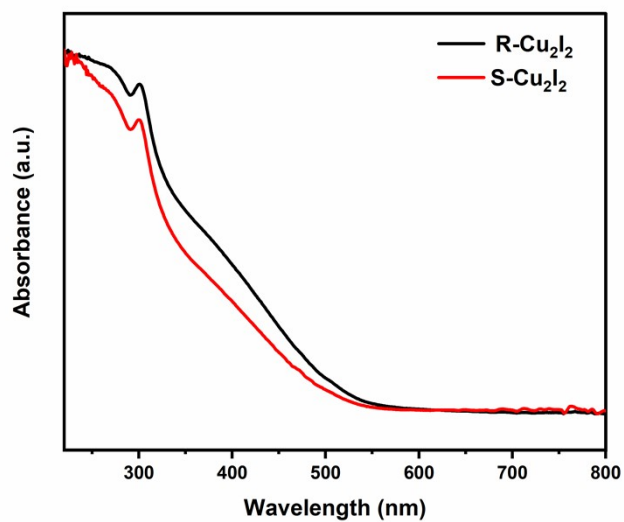

Fig. S11. Ultraviolet absorption spectra of  $R/S\text{-Cu}_2\text{I}_2$ .



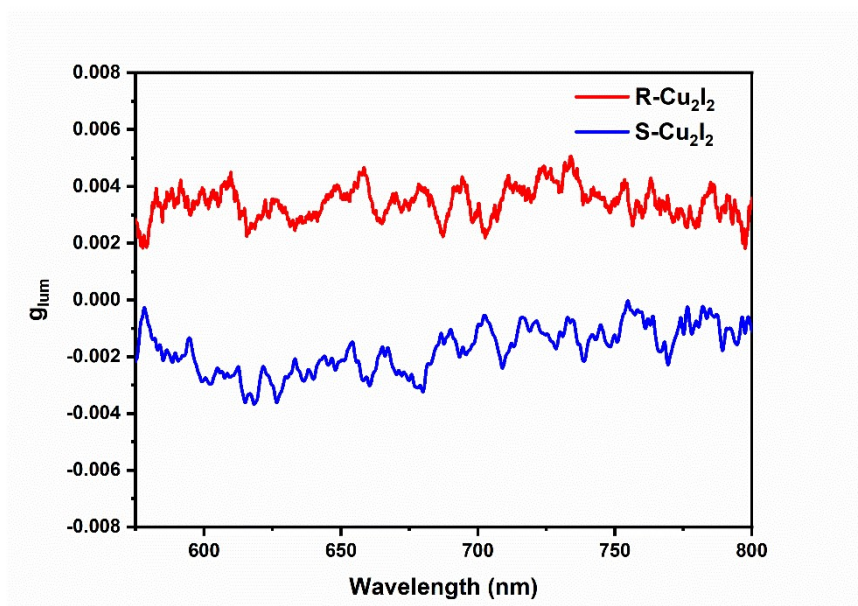

Fig. S12. Asymmetry factor  $g_{lum}$  curves of  $R/S-Cu_2I_2$ .

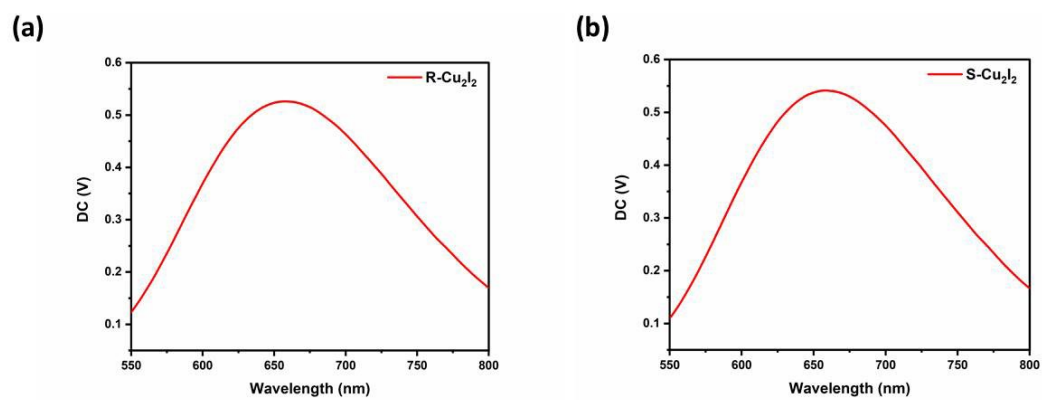

Fig. S13. DC spectra of  $R/S-Cu_2I_2$ .

**Supporting Table:**Table S1. Crystal data and structure refinement for *R*-Cu<sub>2</sub>I<sub>2</sub> and *S*-Cu<sub>2</sub>I<sub>2</sub>.

| Compound                                                                              | <i>R</i> -Cu <sub>2</sub> I <sub>2</sub>                                                               | <i>S</i> -Cu <sub>2</sub> I <sub>2</sub>                                                               |
|---------------------------------------------------------------------------------------|--------------------------------------------------------------------------------------------------------|--------------------------------------------------------------------------------------------------------|
| Crystal Formula                                                                       | <i>R</i> -C <sub>20</sub> H <sub>20</sub> Cu <sub>2</sub> I <sub>2</sub> N <sub>2</sub> O <sub>2</sub> | <i>S</i> -C <sub>20</sub> H <sub>20</sub> Cu <sub>2</sub> I <sub>2</sub> N <sub>2</sub> O <sub>2</sub> |
| Formula weight                                                                        | 701.26                                                                                                 | 701.26                                                                                                 |
| Space group                                                                           | <i>I</i> 2                                                                                             | <i>I</i> 2                                                                                             |
| Crystal system                                                                        | Monoclinic                                                                                             | Monoclinic                                                                                             |
| <i>a</i> /Å                                                                           | 8.6981(2)                                                                                              | 8.68790(10)                                                                                            |
| <i>b</i> /Å                                                                           | 13.2756(4)                                                                                             | 13.24430(10)                                                                                           |
| <i>c</i> /Å                                                                           | 18.4773(4)                                                                                             | 18.54630(10)                                                                                           |
| $\alpha$ /°                                                                           | 90                                                                                                     | 90                                                                                                     |
| $\beta$ /°                                                                            | 98.763(2)                                                                                              | 98.7650(10)                                                                                            |
| $\gamma$ /°                                                                           | 90                                                                                                     | 90                                                                                                     |
| <i>V</i> /Å <sup>3</sup>                                                              | 2108.71(9)                                                                                             | 2109.11(3)                                                                                             |
| <i>Z</i>                                                                              | 4                                                                                                      | 4                                                                                                      |
| $\rho$ /g cm <sup>-3</sup>                                                            | 2.209                                                                                                  | 2.208                                                                                                  |
| $\mu$ /mm <sup>-1</sup>                                                               | 25.628                                                                                                 | 25.623                                                                                                 |
| F(000)                                                                                | 1336.0                                                                                                 | 1336.0                                                                                                 |
| GOF on F <sub>2</sub>                                                                 | 1.007                                                                                                  | 1.064                                                                                                  |
| R <sub>1</sub> <sup>a</sup> /wR <sub>2</sub> <sup>b</sup> [ <i>I</i> > 2( <i>I</i> )] | 0.0235/ 0.0600                                                                                         | 0.0207/0.0562                                                                                          |
| R <sub>1</sub> <sup>a</sup> /wR <sub>2</sub> <sup>b</sup> (all data)                  | 0.0248/ 0.0605                                                                                         | 0.0210/0.0564                                                                                          |
| Flack parameter                                                                       | 0.001(8)                                                                                               | -0.016(3)                                                                                              |

<sup>a</sup>R<sub>1</sub> =  $\Sigma ||F_o| - |F_c|| / \Sigma |F_o|$ . <sup>b</sup>wR<sub>2</sub> =  $\{\Sigma [w(F_o^2 - F_c^2)_2] / \Sigma [w(F_o^2)_2]\}^{1/2}$ .

Table S2. Selected bond lengths (Å) in *R*-Cu<sub>2</sub>I<sub>2</sub>.

| Atom                                             | Atom             | Length/Å   | Atom | Atom             | Length/Å  |
|--------------------------------------------------|------------------|------------|------|------------------|-----------|
| <b>I1</b>                                        | Cu1              | 2.5813(13) | C2   | C3               | 1.530(11) |
| <b>I1</b>                                        | Cu1 <sup>1</sup> | 2.8113(14) | C2   | C4               | 1.522(10) |
| <b>I1</b>                                        | Cu2              | 2.6923(13) | C4   | C5               | 1.527(10) |
| <b>I2</b>                                        | Cu1              | 2.6659(13) | C5   | C6               | 1.390(12) |
| <b>I2</b>                                        | Cu2              | 2.6562(13) | C5   | C10              | 1.388(11) |
| <b>I2</b>                                        | Cu2 <sup>2</sup> | 2.6785(12) | C6   | C7               | 1.402(11) |
| <b>Cu1</b>                                       | Cu1 <sup>1</sup> | 2.687(2)   | C7   | C8               | 1.389(13) |
| <b>Cu1</b>                                       | Cu2              | 2.9810(14) | C8   | C9               | 1.371(11) |
| <b>Cu1</b>                                       | N1               | 2.014(8)   | C9   | C10              | 1.403(10) |
| <b>Cu2</b>                                       | Cu2 <sup>2</sup> | 2.689(2)   | C11  | C11 <sup>1</sup> | 1.464(16) |
| <b>Cu2</b>                                       | N2               | 2.043(8)   | C12  | C13              | 1.512(11) |
| <b>O1</b>                                        | C11              | 1.349(10)  | C13  | C14              | 1.532(10) |
| <b>O1</b>                                        | C12              | 1.469(9)   | C14  | C15              | 1.510(10) |
| <b>O2</b>                                        | C1               | 1.326(10)  | C15  | C16              | 1.360(13) |
| <b>O2</b>                                        | C3               | 1.470(8)   | C15  | C20              | 1.388(12) |
| <b>N1</b>                                        | C11              | 1.285(11)  | C16  | C17              | 1.393(12) |
| <b>N1</b>                                        | C13              | 1.497(9)   | C17  | C18              | 1.337(14) |
| <b>N2</b>                                        | C1               | 1.280(11)  | C18  | C19              | 1.385(14) |
| <b>N2</b>                                        | C2               | 1.497(9)   | C19  | C20              | 1.402(11) |
| <b>C1</b>                                        | C1 <sup>2</sup>  | 1.497(15)  |      |                  |           |
| <sup>1</sup> 1-X,+Y,1-Z; <sup>2</sup> 2-X,+Y,1-Z |                  |            |      |                  |           |

Table S3. Selected bond lengths (Å) in S-Cu<sub>2</sub>I<sub>2</sub>.

| <b>Atom</b>                                           | <b>Atom</b> | <b>Length/Å</b> | <b>Atom</b> | <b>Atom</b> | <b>Length/Å</b> |
|-------------------------------------------------------|-------------|-----------------|-------------|-------------|-----------------|
| <b>I2</b>                                             | Cu1         | 2.6565(7)       | O1          | C2          | 1.472(5)        |
| <b>I2</b>                                             | Cu11        | 2.6757(7)       | N1          | C3          | 1.501(5)        |
| <b>I2</b>                                             | Cu2         | 2.6656(7)       | C10         | C9          | 1.402(6)        |
| <b>I1</b>                                             | Cu1         | 2.6918(7)       | C10         | C5          | 1.396(7)        |
| <b>I1</b>                                             | Cu2         | 2.5825(7)       | C9          | C8          | 1.392(7)        |
| <b>I1</b>                                             | Cu22        | 2.8076(8)       | C8          | C7          | 1.373(7)        |
| <b>Cu1</b>                                            | Cu11        | 2.6882(12)      | C18         | C19         | 1.368(9)        |
| <b>Cu1</b>                                            | Cu2         | 2.9765(9)       | C18         | C17         | 1.379(8)        |
| <b>Cu1</b>                                            | N1          | 2.044(5)        | C11         | C112        | 1.476(8)        |
| <b>Cu2</b>                                            | Cu22        | 2.6881(12)      | C5          | C6          | 1.390(6)        |
| <b>Cu2</b>                                            | N2          | 2.023(5)        | C5          | C4          | 1.519(5)        |
| <b>N2</b>                                             | C11         | 1.273(6)        | C7          | C6          | 1.395(6)        |
| <b>N2</b>                                             | C13         | 1.496(5)        | C17         | C16         | 1.392(7)        |
| <b>C1</b>                                             | C11         | 1.481(7)        | C13         | C14         | 1.536(6)        |
| <b>C1</b>                                             | O1          | 1.344(6)        | C13         | C12         | 1.516(7)        |
| <b>C1</b>                                             | N1          | 1.277(6)        | C3          | C2          | 1.529(7)        |
| <b>O2</b>                                             | C11         | 1.344(6)        | C3          | C4          | 1.519(6)        |
| <b>O2</b>                                             | C12         | 1.480(5)        | C16         | C15         | 1.397(7)        |
| <b>C20</b>                                            | C19         | 1.388(7)        | C15         | C14         | 1.506(5)        |
| <b><sup>1</sup>1-X,+Y,1-Z; <sup>2</sup>2-X,+Y,1-Z</b> |             |                 |             |             |                 |
